# Supplementary material
Source: Springer Nature journal article supplement (https://www.springermedizin.de/resource/supplementary/12968_2009_492_MOESM4_ESM.pdf/9579100)

**A**

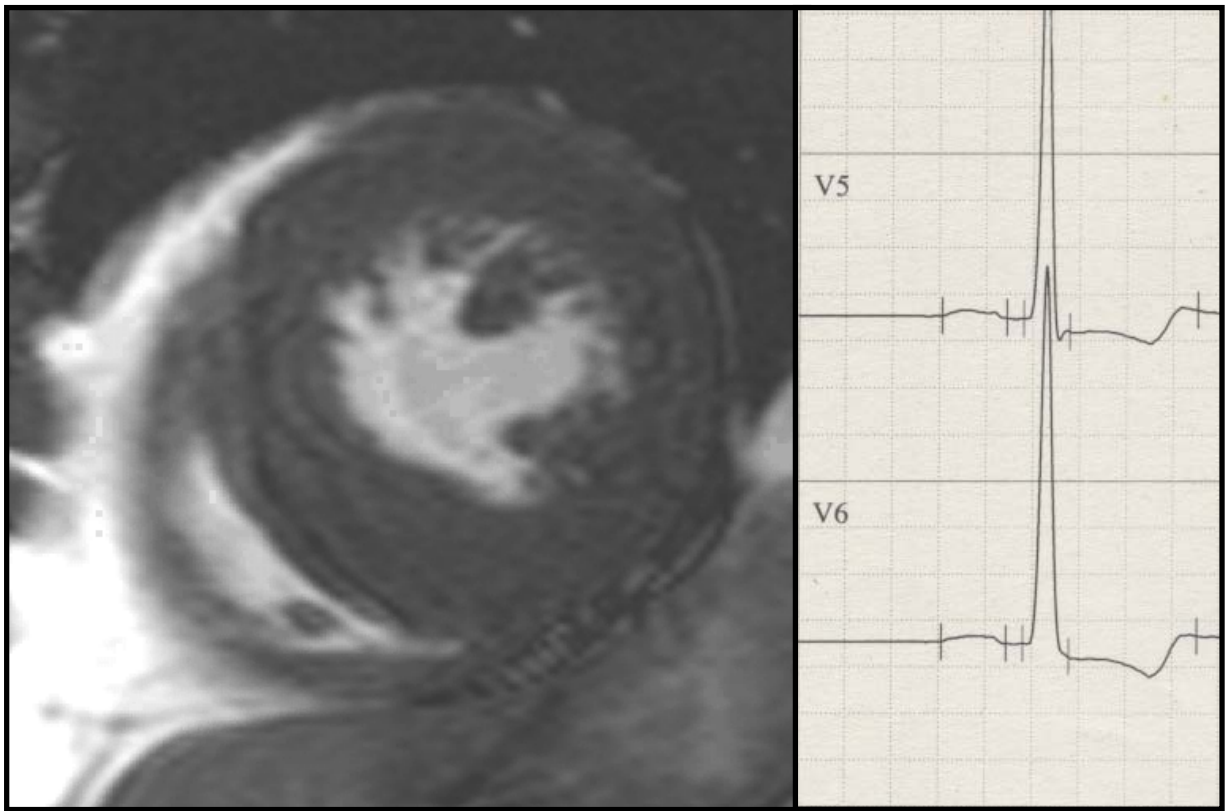

**B**

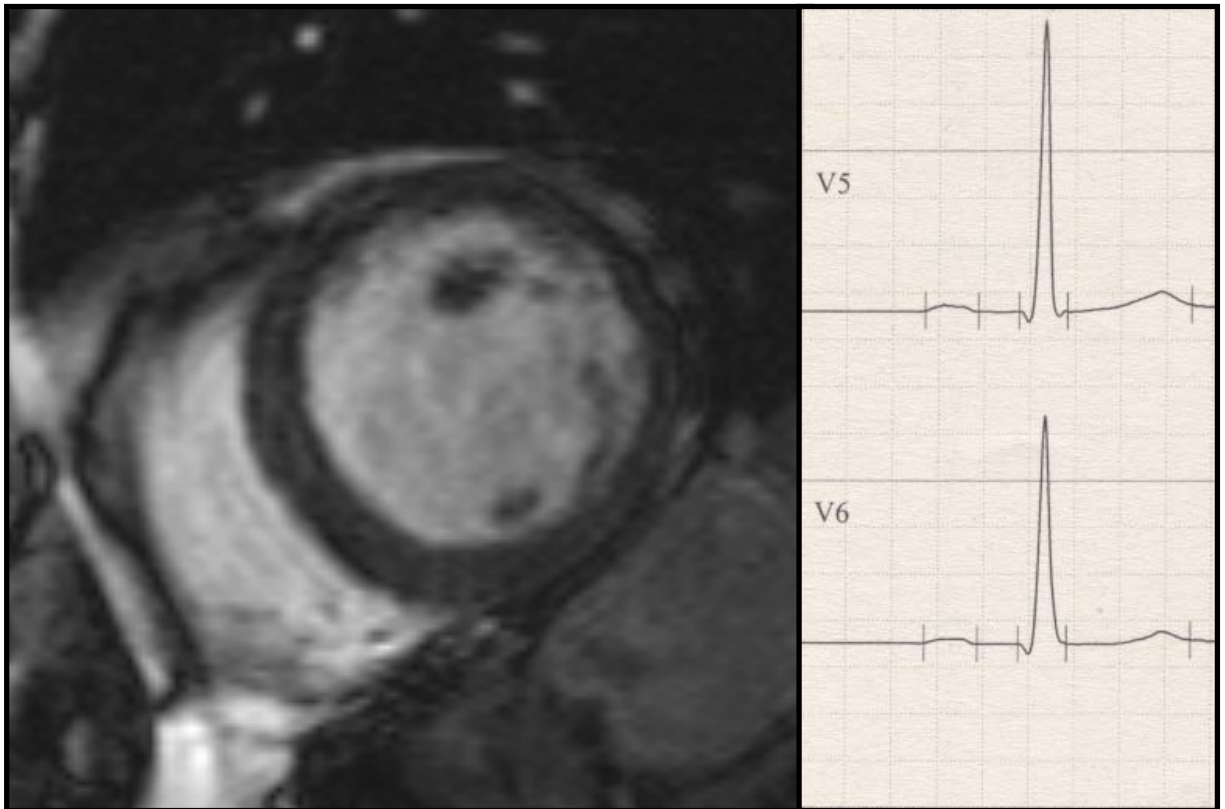

Supplement: MOESM4 [file 9579100]
